# Supplementary material for: Human stem cells transplanted into the rat stroke brain migrate to the spleen via lymphatic and inflammation pathways
Source: PubMed Central journal article supplement — Haematologica. 2018 Dec 4;104(5):1062–73. doi: 10.3324/haematol.2018.206581 (PMC6518907; doi:10.3324/haematol.2018.206581), 2019-05
Supplement: 2018_206581-Disclosures_and_Contributions.pdf [file 2018_206581-Disclosures_and_Contributions.pdf]

Haematologica  
HAEMATOL/2018/206581  
Version 3

Human stem cells transplanted into the rat stroke brain migrate to spleen via lymphatic and inflammation pathways

Kaya Xu, Jea-Young Lee, Yuji Kaneko, Julian P. Tuazon, Fernando Vale, Harry van Loveren, and Cesario V. Borlongan

Disclosures: None

Contributions: K.X., J.L., Y.K., F.V., H.V., and C.V.B. contributed to the conception and design of the study. K.X., J.L., and Y.K. contributed to the acquisition of data. All authors contributed to the analysis of data. K.X., J.L., J.P.T., and C.V.B. contributed to drafting the text and preparing the figures.
